# Supplementary material for: A novel necroptosis-related lncRNA signature for predicting prognosis and anti-cancer treatment response in endometrial cancer
Source: PubMed Central journal article supplement (PMC9708746; doi:10.3389/fimmu.2022.1018544), 2022-11-16

Figure S1

A

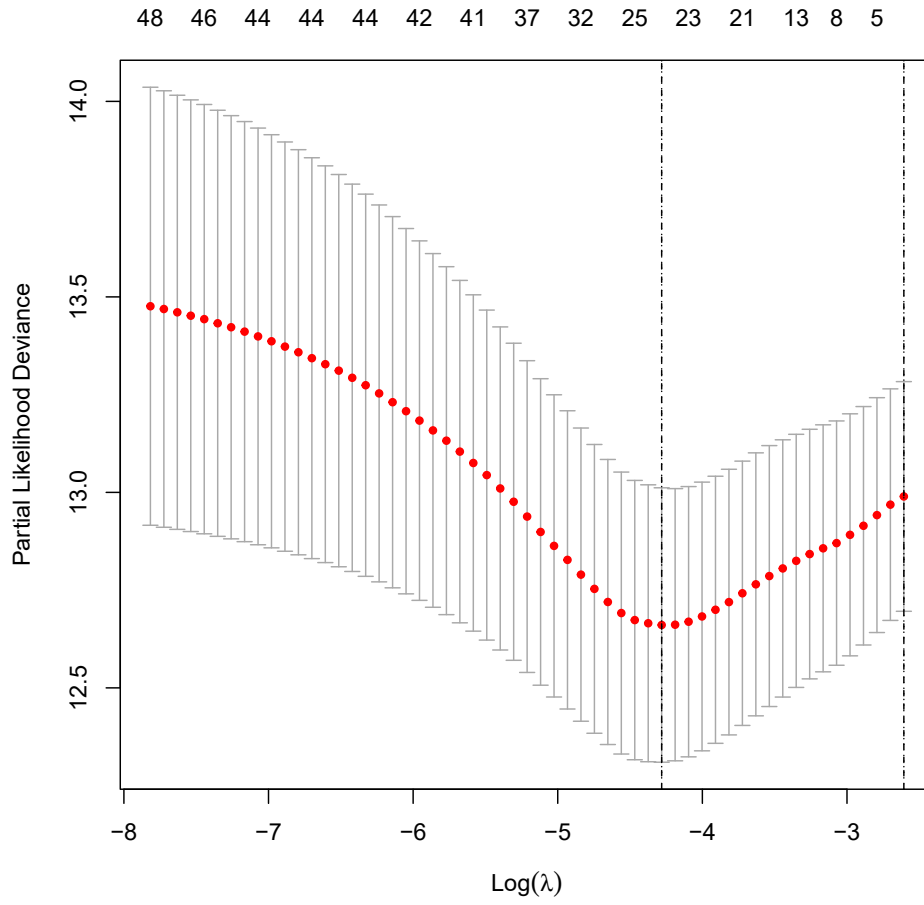

B

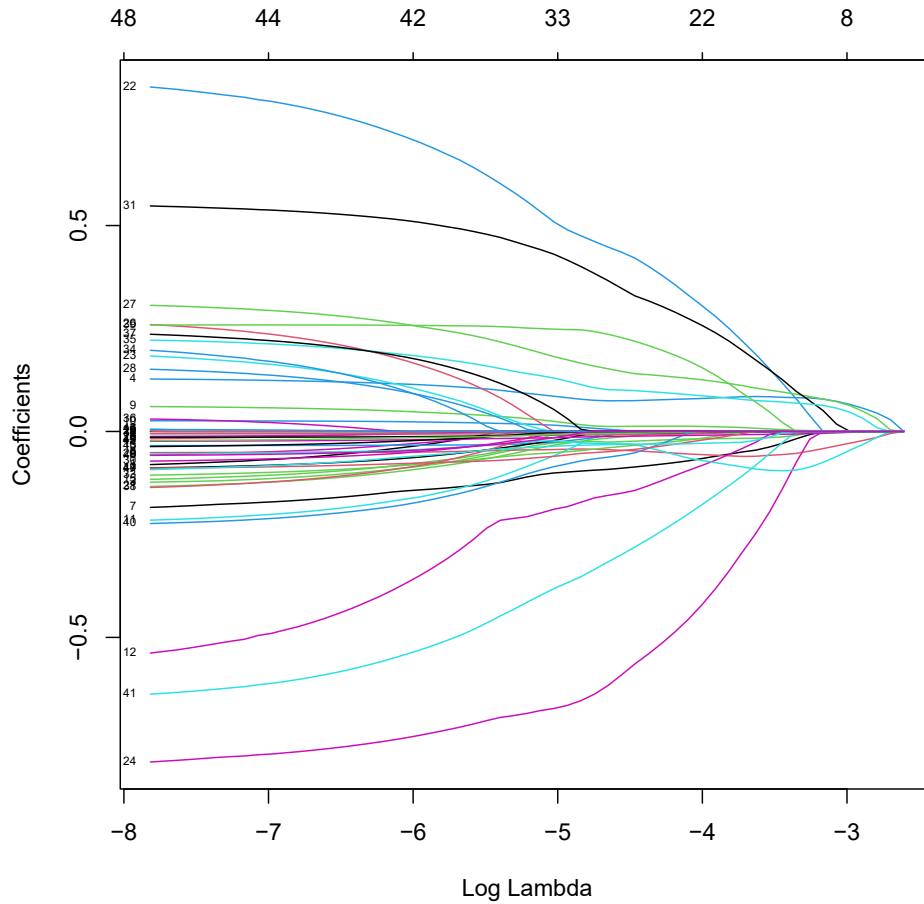

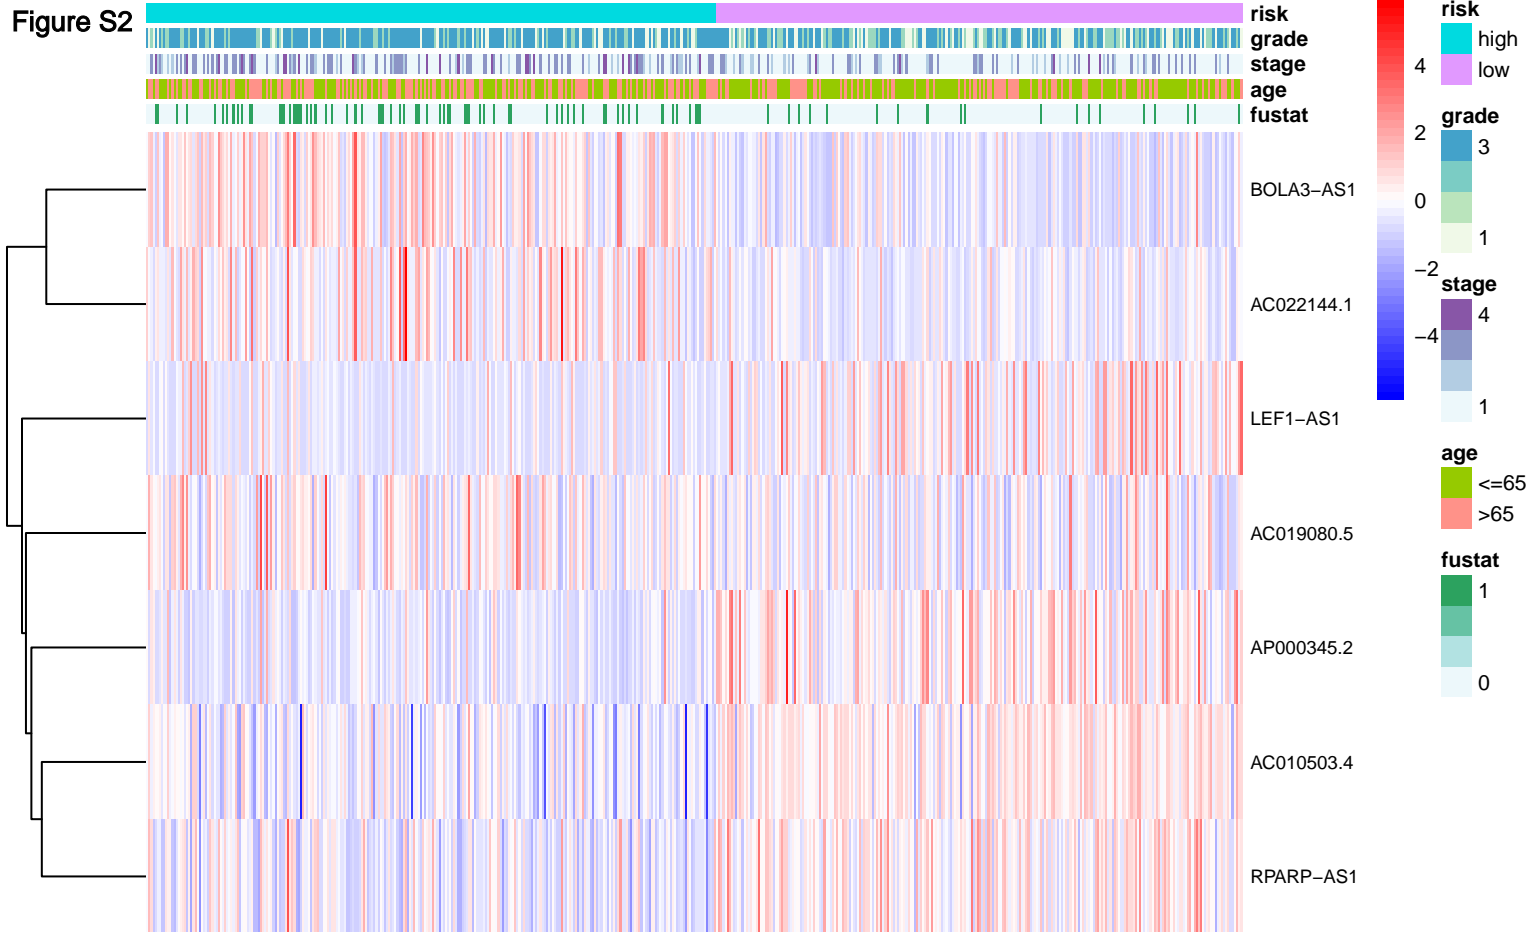

**Figure S3**

**Training set**

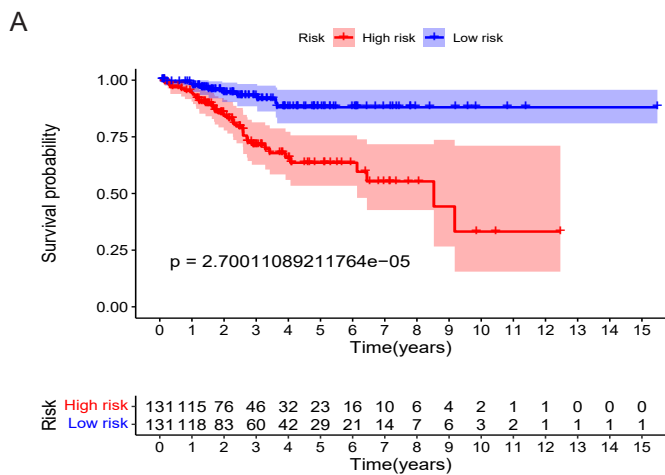

**Testing set**

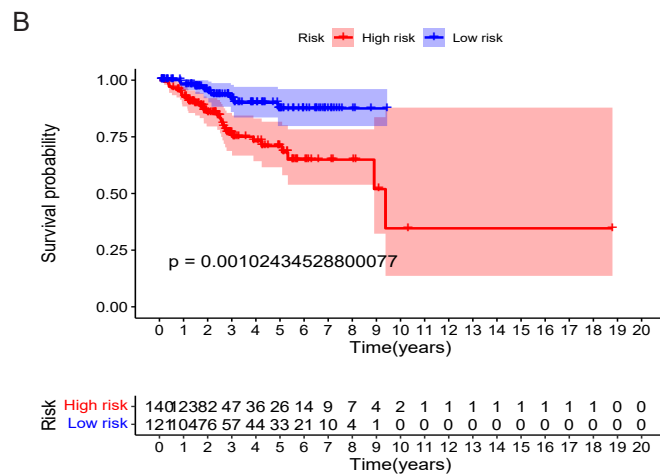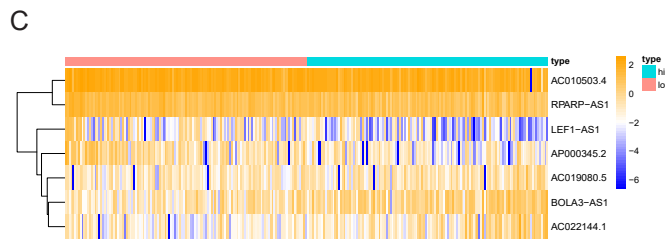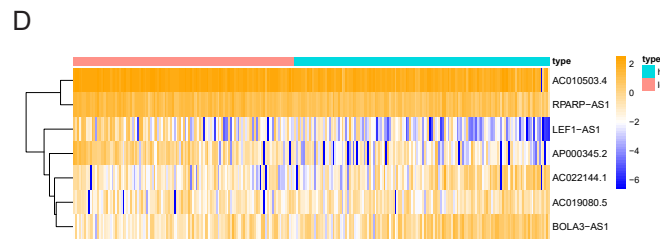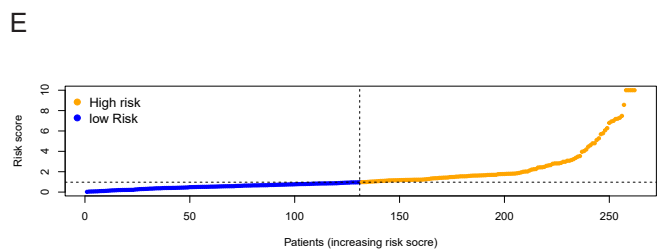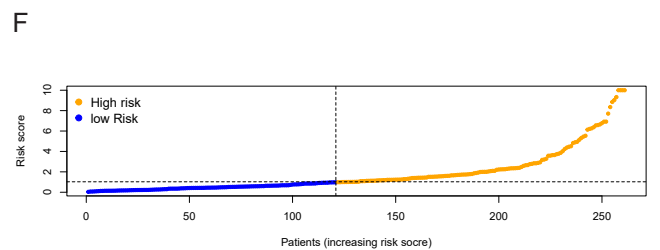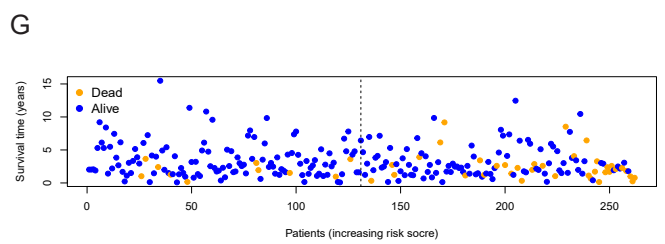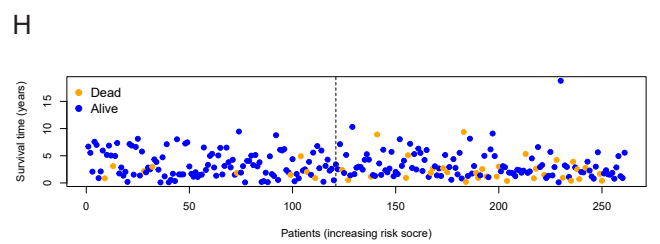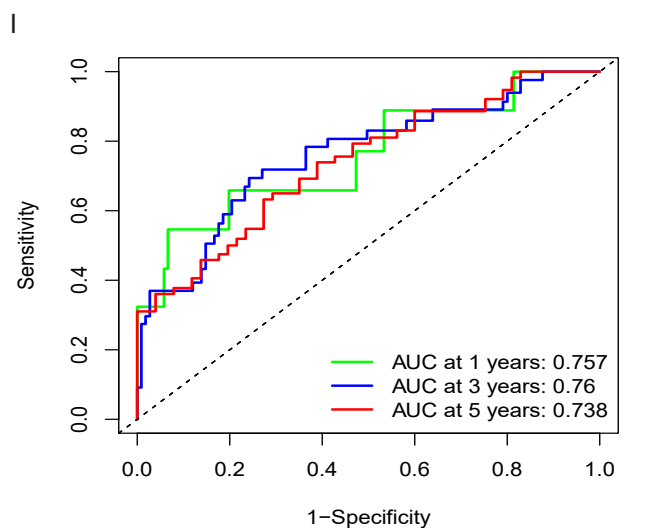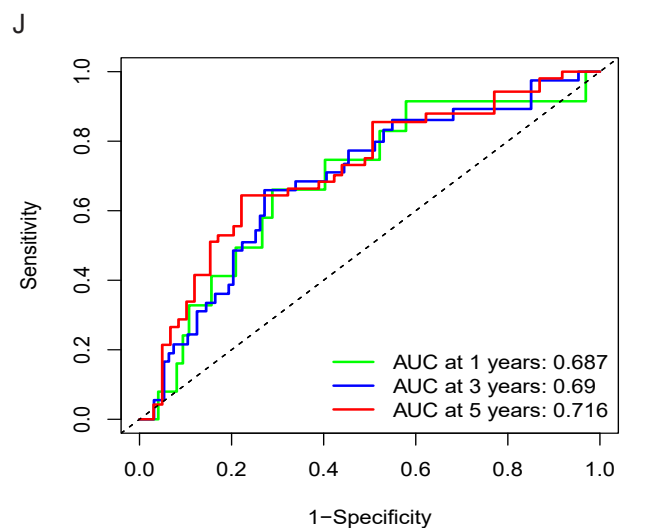

Figure S4

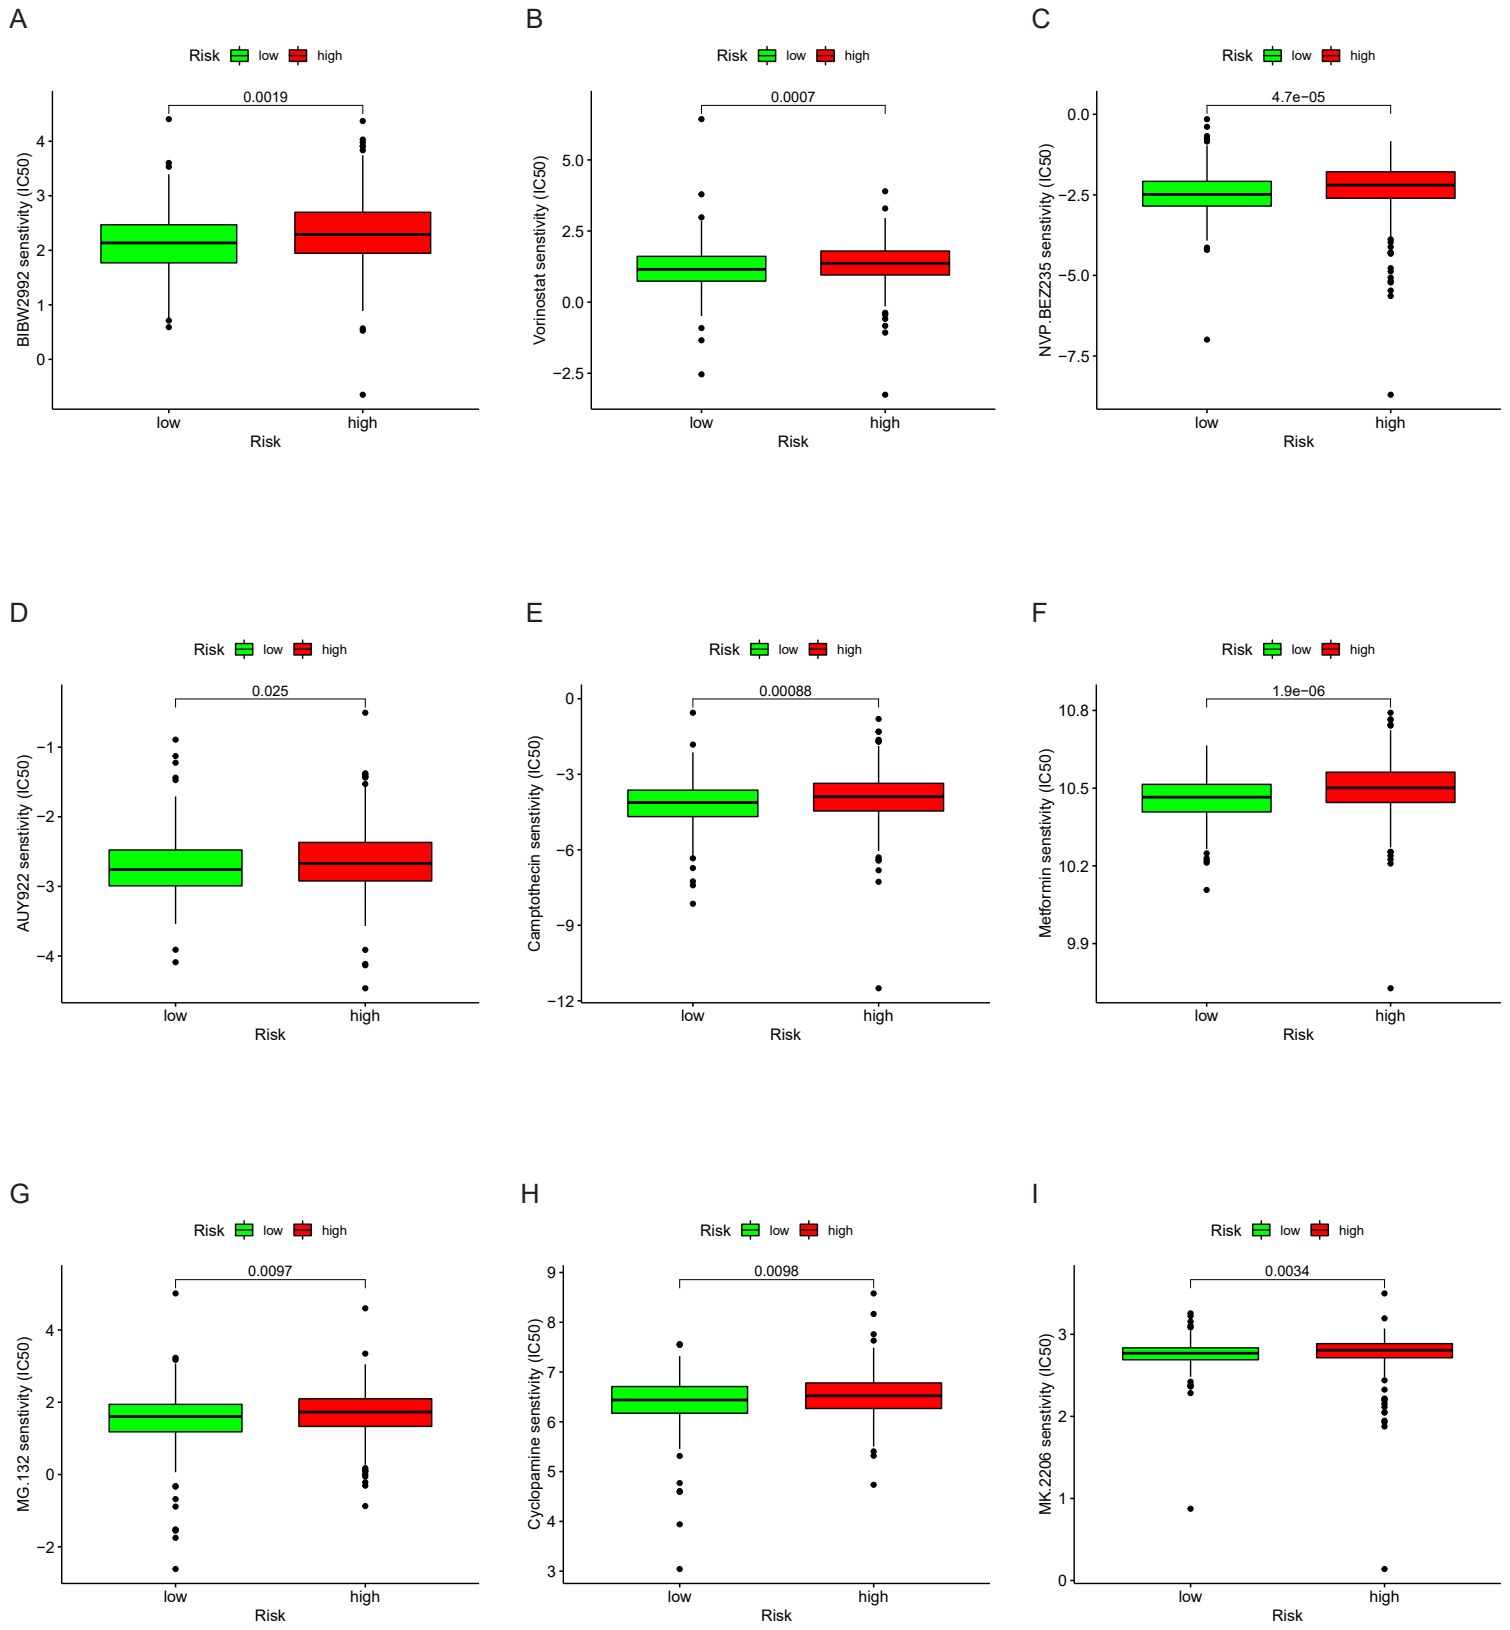

Figure S5

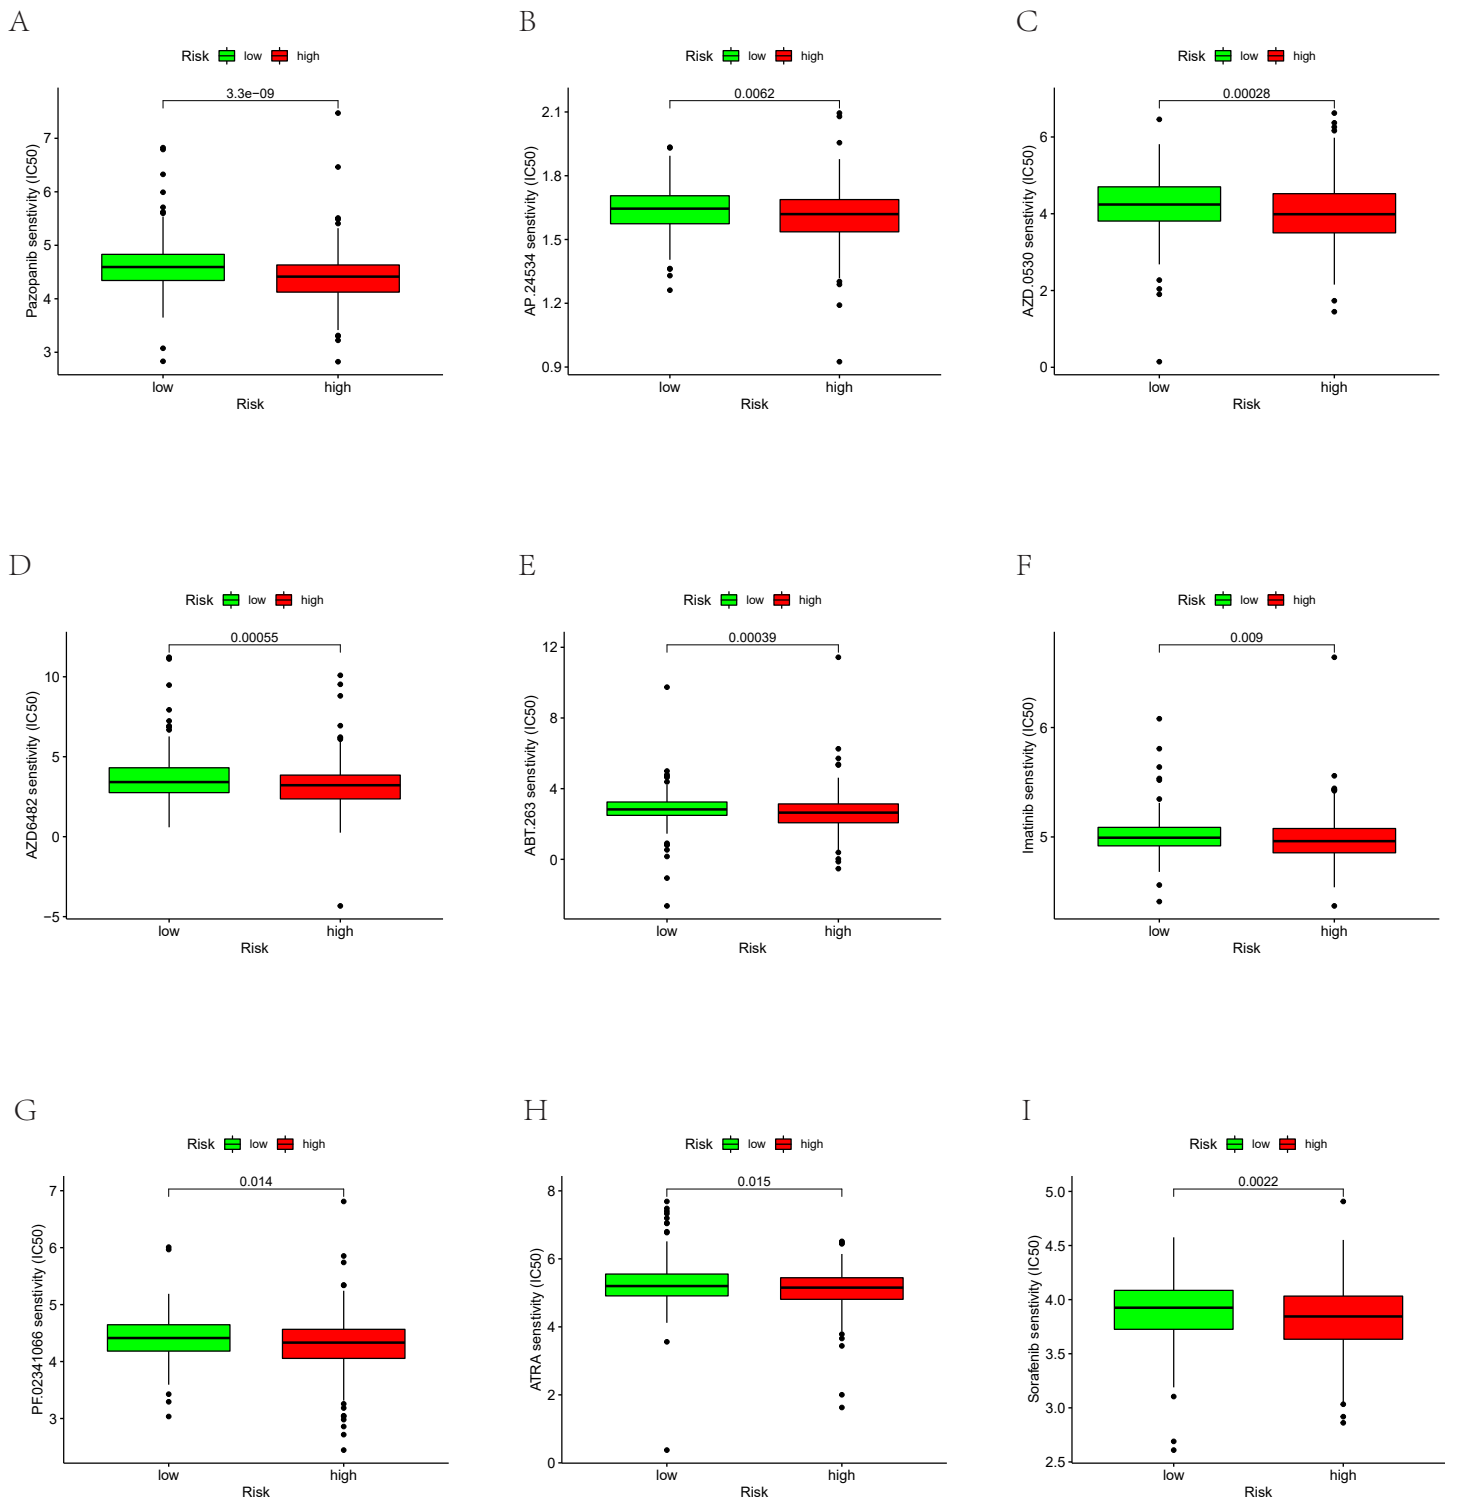

Supplement: DataSheet_1.pdf [file DataSheet_1.pdf]
